# Supplementary material for: Synergistic interactions between g-C3N4 and Cu–Zn-MOFs via electrostatic assembly for enhanced electrocatalytic CO2 reduction
Source: Royal Society of Chemistry journal article supplement (doi:10.1039/d4dt03554b), 2025-01-01
Supplement: d4dt03554b1.pdf [file d4dt03554b1.pdf]

## **Synergistic interaction between g-C<sub>3</sub>N<sub>4</sub> and Cu-Zn-MOFs via electrostatic assembly for enhanced electrocatalytic CO<sub>2</sub> reduction**

Xiaoqing Lu,<sup>a</sup> Zhaolong Yue,<sup>a</sup> Hongyu Chen,<sup>\*b</sup> Siyuan Liu,<sup>a</sup> Shuxian Wei,<sup>b</sup> Zhaojie Wang<sup>a</sup>

<sup>a</sup>School of Materials Science and Engineering, China University of Petroleum (East China), Qingdao 266580, P. R. China

<sup>b</sup>College of Science, China University of Petroleum (East China), Qingdao 266580, P. R. China

### **Corresponding Author:**

\*E-mail: [hychen1226@163.com](mailto:hychen1226@163.com)

**Keywords:** Electrocatalytic CO<sub>2</sub> reduction, Electrostatic assembly, g-C<sub>3</sub>N<sub>4</sub>, Cu-Zn-MOFs, Electronic effects

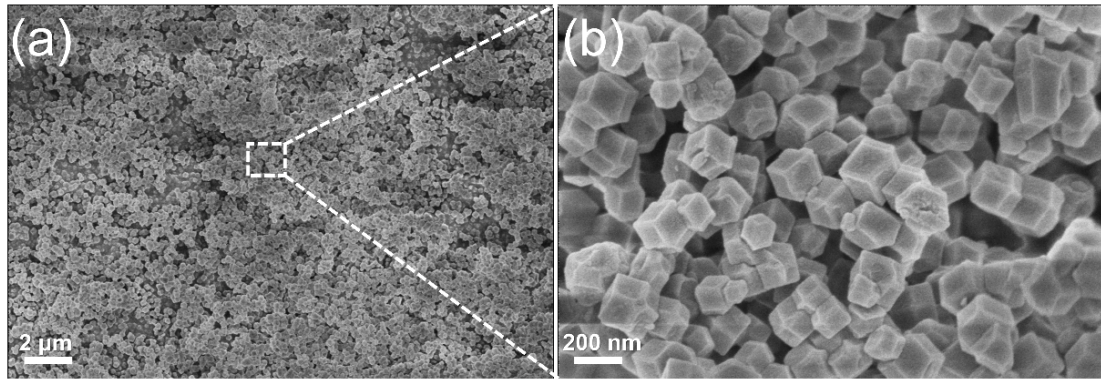

**Fig. S1.** SEM and corresponding high-magnification images of ZIF-8.

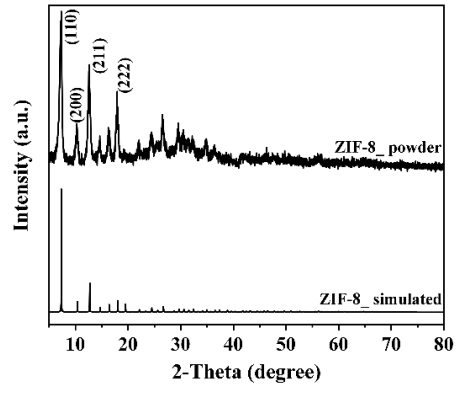

**Fig. S2.** XRD patterns of ZIF-8 powder and ZIF-8 simulation.

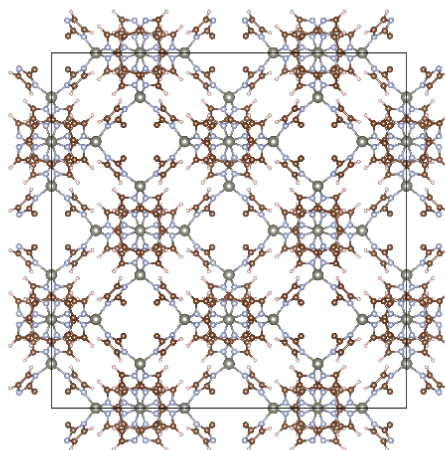

**Fig. S3.** The crystal pattern of simulated ZIF-8.

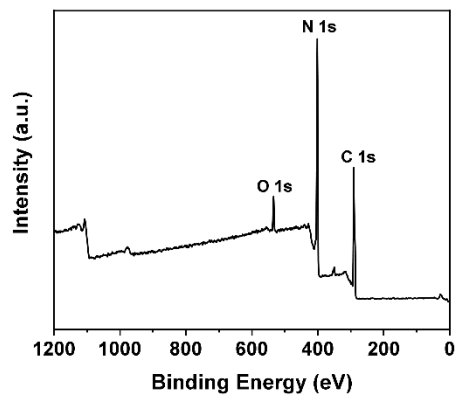

**Fig. S4.** XPS survey spectrum of g-C<sub>3</sub>N<sub>4</sub>.

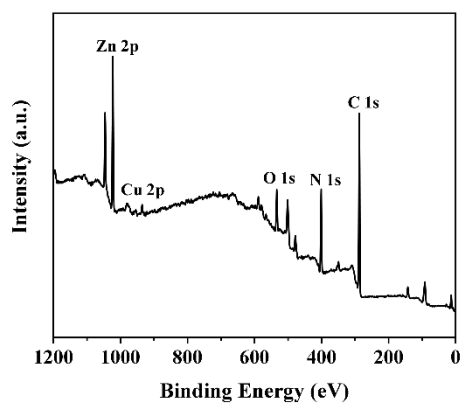

**Fig. S5.** XPS survey spectrum of Cu-Zn-MOFs.

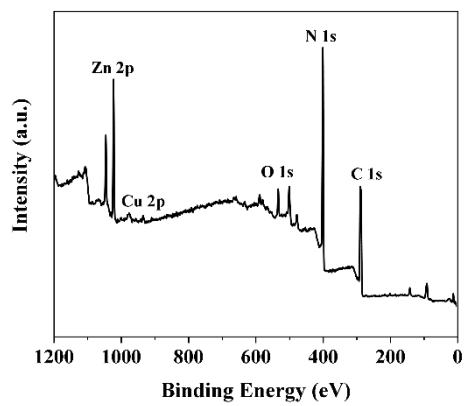

**Fig. S6.** XPS survey spectrum of g-C<sub>3</sub>N<sub>4</sub>@Cu-Zn-MOFs-1:1.

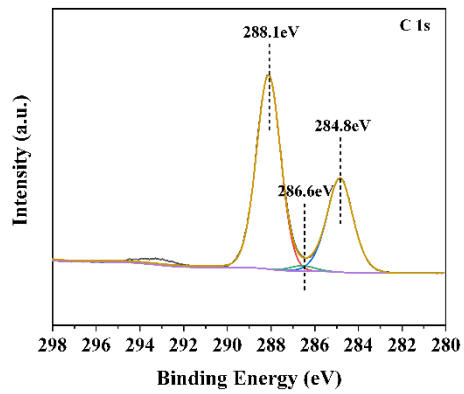

**Fig. S7.** XPS spectrum. C 1s of g-C<sub>3</sub>N<sub>4</sub>.



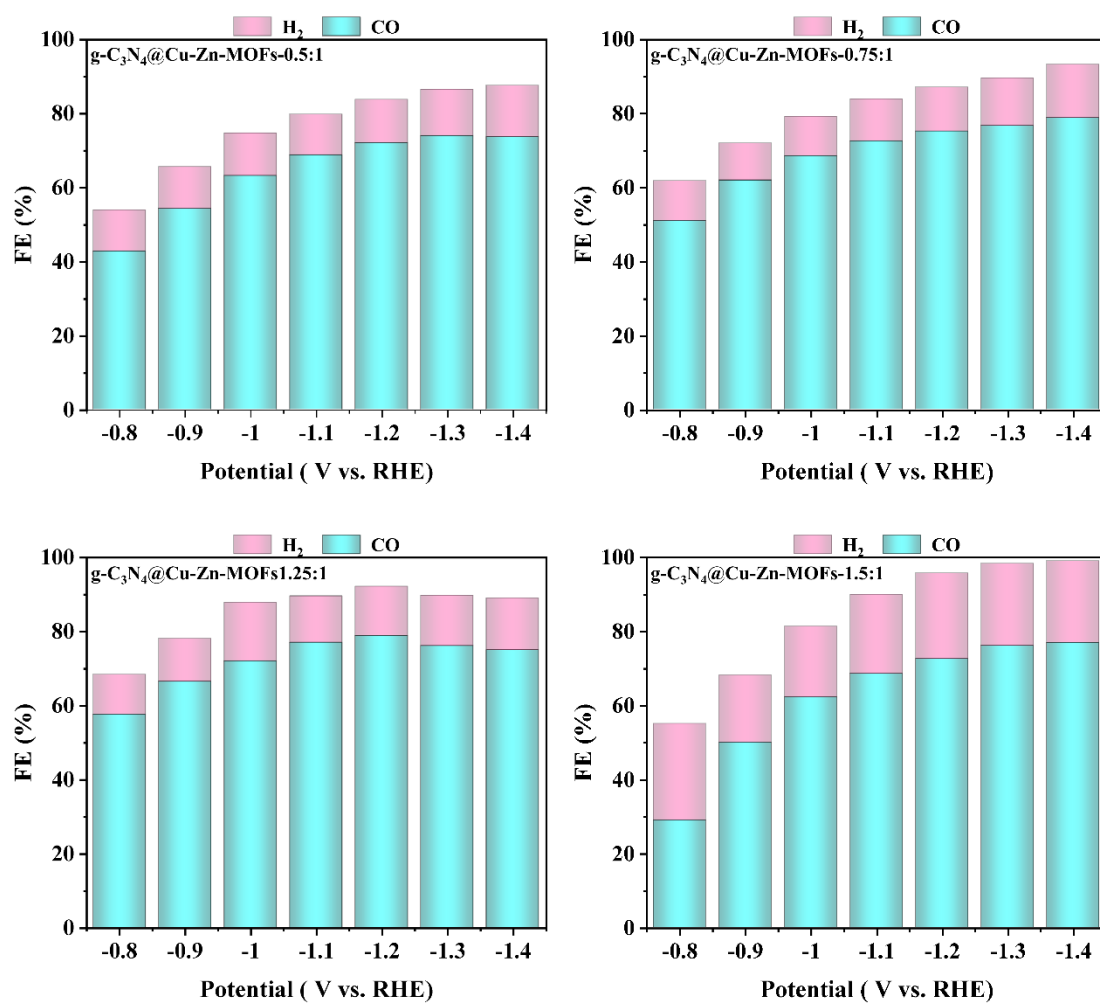

**Fig. S8.** Potential-dependent Faradaic efficiency of (a) g-C<sub>3</sub>N<sub>4</sub>@Cu-Zn-MOFs-0.5:1, (b) g-C<sub>3</sub>N<sub>4</sub>@Cu-Zn-MOFs-0.75:1, (c) g-C<sub>3</sub>N<sub>4</sub>@Cu-Zn-MOFs-1.25:1, and (d) g-C<sub>3</sub>N<sub>4</sub>@Cu-Zn-MOFs-1.5:1.

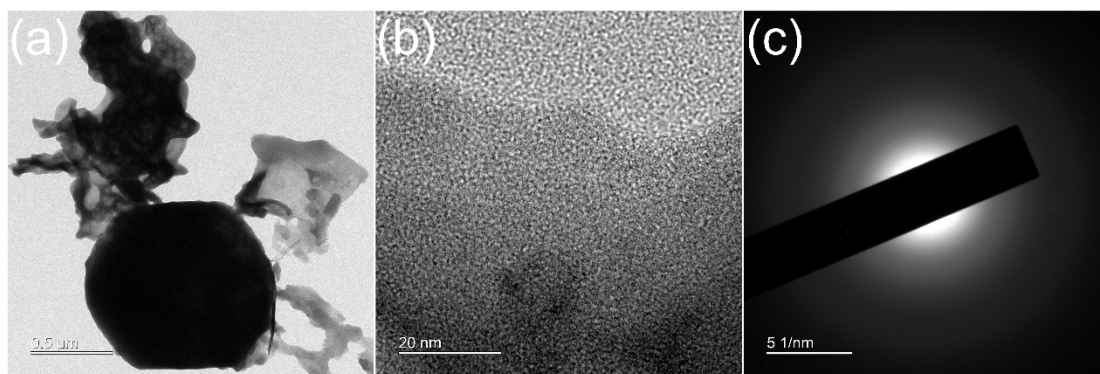

**Fig. S9.** (a) TEM, (b) HRTEM, and (c) SAED images of  $g\text{-C}_3\text{N}_4@\text{CuZn-MOFs-1:1}$  after  $e\text{CO}_2\text{R}$ .

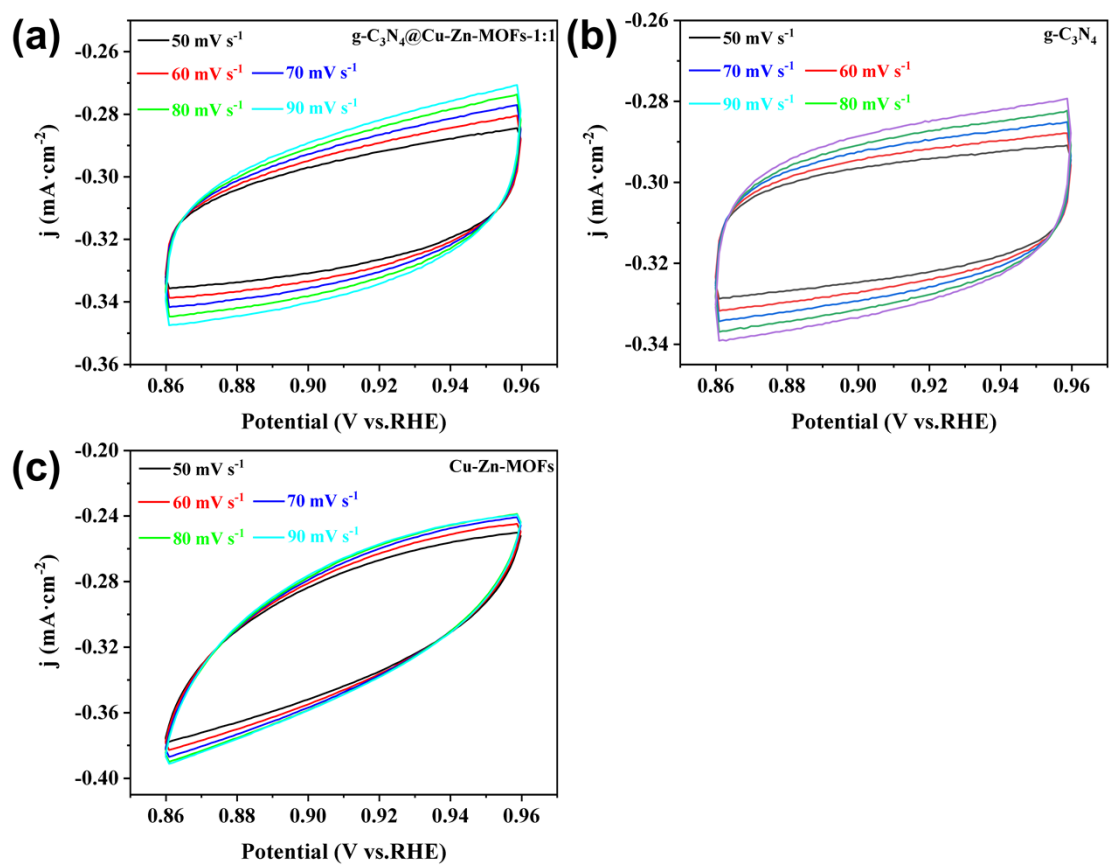

**Fig. S10.** Cyclic voltammograms of (a)  $\text{g-C}_3\text{N}_4@\text{Cu-Zn-MOFs-1:1}$ , (b)  $\text{g-C}_3\text{N}_4$ , and (c)  $\text{Cu-Zn-MOFs}$  at different scan rates.

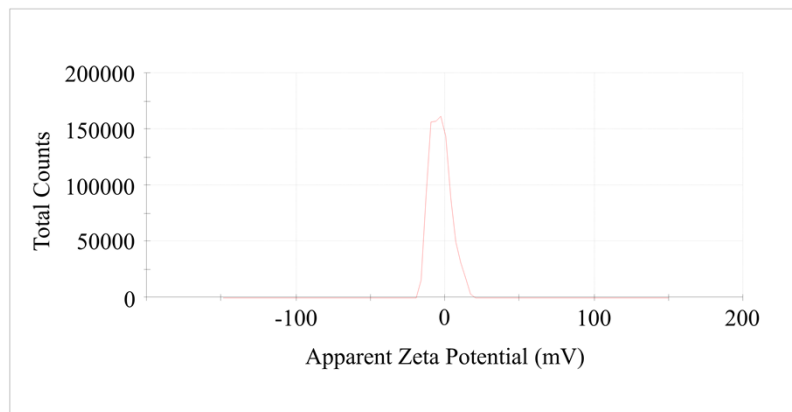

**Fig. S11.** Zeta potential distribution of g-C<sub>3</sub>N<sub>4</sub>.

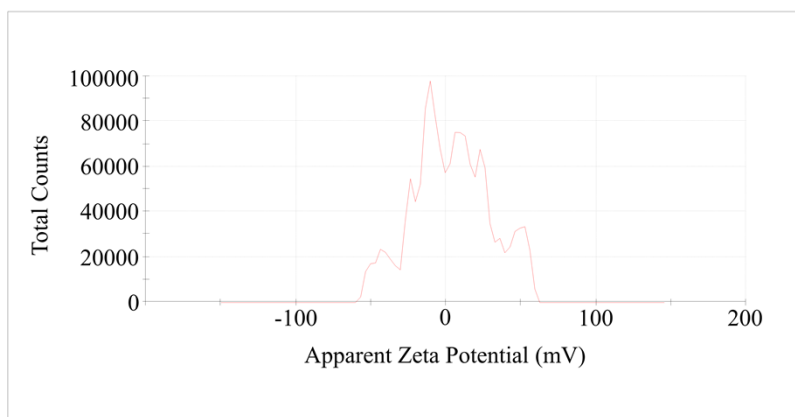

**Fig. S12.** Zeta potential distribution of Cu-Zn-MOFs.

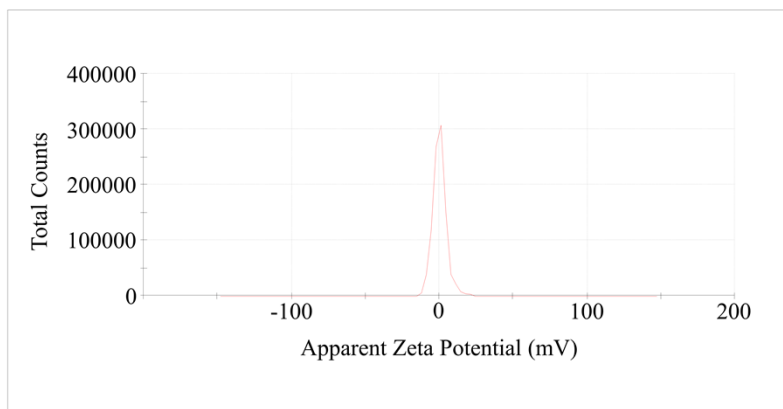

**Fig. S13.** Zeta potential distribution of g-C<sub>3</sub>N<sub>4</sub>@Cu-Zn-MOFs-1:1.

**Table S1.** The contents of C, N, O, Zn, and Cu in g-C<sub>3</sub>N<sub>4</sub>@Cu-Zn-MOFs-1:1 measured by the energy dispersive spectrometer (EDS) spectrum.

| <b>Elements</b> | <b>C</b> | <b>N</b> | <b>O</b> | <b>Zn</b> | <b>Cu</b> |
|-----------------|----------|----------|----------|-----------|-----------|
| <b>wt.%</b>     | 64.44    | 21.19    | 7.08     | 6.44      | 0.86      |

**Table S2.** Summary of the reported NC-, g-C<sub>3</sub>N<sub>4</sub>-, and MOFs-based electrocatalysts for eCO<sub>2</sub>R to CO.

| <b>Electrocatalysts</b>                                     | <b>Potentials<br/>(V vs. RHE)</b> | <b>FE<sub>CO</sub><br/>(%)</b> | <b><i>j</i><sub>CO</sub><br/>(mA cm<sup>-2</sup>)</b> | <b>References</b> |
|-------------------------------------------------------------|-----------------------------------|--------------------------------|-------------------------------------------------------|-------------------|
| g-C <sub>3</sub> N <sub>4</sub> @Cu-Zn-<br>MOFs-1:1         | -1.3                              | 85                             | 21.3                                                  | This work         |
| Fe-N <sub>5</sub> /C                                        | -0.7                              | 67.8                           | 3.8                                                   | [S1]              |
| Fe NP/NC                                                    | -0.7                              | 35.7                           | 1.1                                                   | [S1]              |
| g-C <sub>3</sub> N <sub>4</sub> /MWCNTs                     | -0.75                             | 60                             | 0.55                                                  | [S2]              |
| CuSe/g-C <sub>3</sub> N <sub>4</sub>                        | -1.2                              | 85.2                           | 8.5                                                   | [S3]              |
| NRMC-900                                                    | -0.7                              | 80                             | 2.9                                                   | [S4]              |
| NCNTs                                                       | -0.8                              | 80                             | 0.8                                                   | [S5]              |
| NC-900                                                      | -0.95                             | 78                             | 0.8                                                   | [S6]              |
| ACN-850                                                     | -1.1                              | 80                             | 2.4                                                   | [S7]              |
| Ag/g-C <sub>3</sub> N <sub>4</sub>                          | -0.7                              | 94                             | 10.1                                                  | [S8]              |
| P-Ag/g-C <sub>3</sub> N <sub>4</sub>                        | -0.9                              | 80.9                           | 9.8                                                   | [S8]              |
| PcCu-O <sub>8</sub> -Zn/CNT                                 | -0.7                              | 88                             | 8                                                     | [S9]              |
| Ag@Ui-66-SH                                                 | -1.1                              | 74                             | 19.5                                                  | [S10]             |
| NiSA-N <sub>2</sub> -C                                      | -0.8                              | 98                             | 14.7                                                  | [S11]             |
| Cu-MOFs<br>[Cu(L)SO <sub>4</sub> ] $\cdot$ H <sub>2</sub> O | -0.89                             | 77.5                           | 3                                                     | [S12]             |
| Ag <sub>2</sub> O/layered ZIF                               | -1.2                              | 80.6                           | 26.2                                                  | [S13]             |
| Re-SURMOFs                                                  | -1.6                              | 93                             | 2.5                                                   | [S14]             |
| 2D Ni(Im) <sub>2</sub> -5 nm                                | -0.9                              | 79.3                           | 5.2                                                   | [S15]             |



## References

- S1 L. Wang, X. Lai, Y. Xu, S. Luo, L. Wang, K. Yan, D. Zhang, S. Feng and Y. Xu, *Catal. Sci. Technol.*, 2023, **13**, 3946-3952.
- S2 X. Lu, T. H. Tan, Y. H. Ng and R. Amal, *Chem.-Eur. J.*, 2016, **22**, 11991-11996.
- S3 H. Zhang, T. Ouyang, J. Li, M. Mu and X. Yin, *Electrochim. Acta*, 2021, **390**, 138766.
- S4 R. Daiyan, X. Tan, R. Chen, W. H. Saputera, H. A. Tahini, E. Lovell, Y. H. Ng, S. C. Smith, L. Dai, X. Lu and R. Amal, *ACS Energy Lett.*, 2018, **3**, 2292-2298.
- S5 J. Wu, R. M. Yadav, M. Liu, P. P. Sharma, C. S. Tiwary, L. Ma, X. Zou, X. D. Zhou, B. I. Yakobson, J. Lou and P. M. Ajayan, *ACS Nano*, 2015, **9**, 5364-5371.
- S6 R. Wang, X. Sun, S. Ould-Chikh, D. Osadchii, F. Bai, F. Kapteijn and J. Gascon, *ACS Appl. Mater. Interfaces*, 2018, **10**, 14751-14758.
- S7 P. P. Sharma, J. Wu, R. M. Yadav, M. Liu, C. J. Wright, C. S. Tiwary, B. I. Yakobson, J. Lou, P. M. Ajayan and X. D. Zhou, *Angew. Chem. Int. Edit.*, 2015, **127**, 13905-13909.
- S8 S. Zhang, Z. Mo, J. Wang, H. Liu, P. Liu, D. Hu, T. Tan and C. Wang, *Electrochim. Acta*, 2021, **390**, 138831.
- S9 H. Zhong, M. Ghorbani-Asl, K.H. Ly, J. Zhang, M. Wang, Z. Liao, D. Makarov, E. Zschech, E. Brunner and I.M. Weidinger, *Nat. Commun.*, 2020, **11**, 1409.
- S10 R.K. Aparna, V. Surendran, D. Roy, B. Pathak, M.M. Shaijumon and S. Mandal, *ACS Appl. Energy Mater.*, 2023, **6**, 4072-4078.
- S11 Y.N. Gong, L. Jiao, Y. Qian, C.Y. Pan, L. Zheng, X. Cai, B. Liu, S.H. Yu and H.L. Jiang, *Angew. Chem. Int. Edit.*, 2020, **132**, 2727-2731.
- S12 T. Yan, P. Wang, Z.H. Xu and W.Y. Sun, *ACS Appl. Mater. Interfaces*, 2022, **14**, 13645-13652.
- S13 X. Jiang, H. Wu, S. Chang, R. Si, S. Miao, W. Huang, Y. Li, G. Wang and X. Bao, *J. Mater. Chem. A*, 2017, **5**, 19371.
- S14 L. Ye, J. Liu, Y. Gao, C. Gong, M. Addicoat, T. Heine, C. Wöll and L. Sun, *J. Mater. Chem. A*, 2016, **4**, 15320.

S15 J.X. Wu, W.W. Yuan, M. Xu and Z.Y. Gu, *Chem. Commun.*, 2019, **55**, 11634-11637.
